# Supplementary material for: Comparative studies of hexagonal boron phosphide/V2CS2 heterostructure and homogeneous bilayers as metal-ion battery anodes
Source: Royal Society of Chemistry journal article supplement (doi:10.1039/d3cp00221g), 2023-01-01
Supplement: d3cp00221g1.pdf [file d3cp00221g1.pdf]

**Supporting information for:**

**Comparative studies of hexagonal boron  
phosphide/ $V_2CS_2$  heterostructure and its monolayers  
as metal-ion battery anodes**

Xian Yuan, †, ‡ Zhongyong Zhang, † Yuping He, ‡ Naigen Zhou\*†

†School of Physics and Materials Science, Nanchang University, Nanchang 330031,  
China

‡ School of Science, Nanchang Institute of Technology, Nanchang 330099, China

Corresponding authors

E-mail address: ngzhou@ncu.edu.cn (Naigen Zhou)

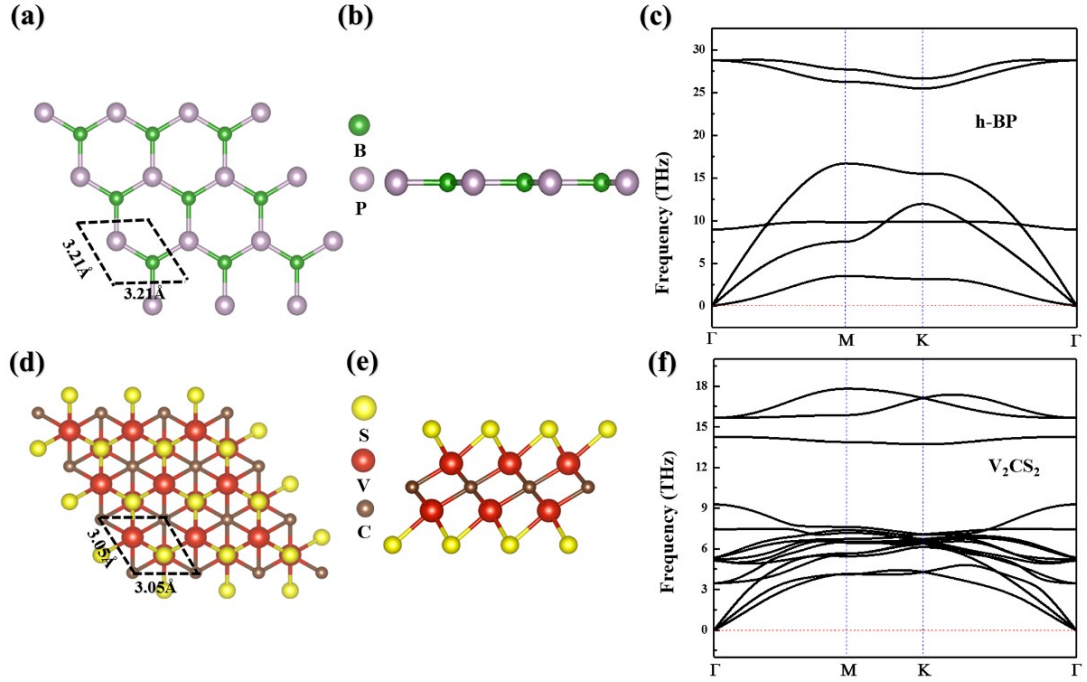

Figure S1. Top and side views of (a, b) hexagonal boron phosphide (h-BP) and (d, e)  $V_2CS_2$ , respectively. Phonon dispersion spectra of (c) h-BP monolayer and (f)  $V_2CS_2$  monolayer, respectively.

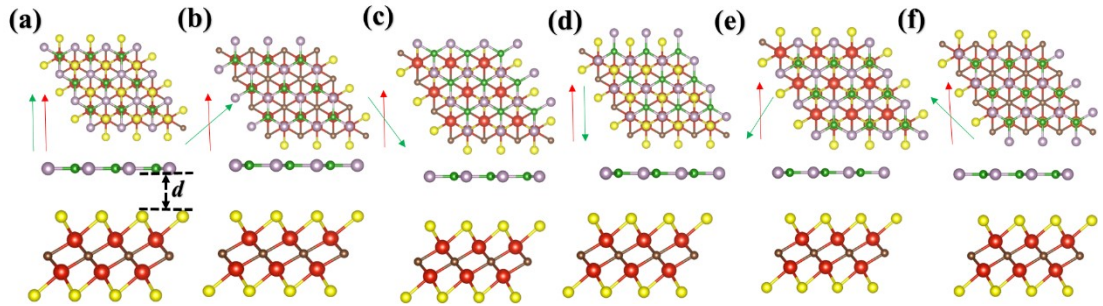

Figure S2. Top and side views of six stacking configurations of h-BP/ $V_2CS_2$ . The rotation angles of h-BP with respect to  $V_2CS_2$  are set to (a)  $0^\circ$ , (b)  $60^\circ$ , (c)  $120^\circ$ , (d)  $180^\circ$ , (e)  $240^\circ$ , and (f)  $300^\circ$ , respectively. The  $d$  is the interface distance.

Table S1. The interface formation energy  $E_f$  and distance  $d$  of configurations of h-BP/ $V_2CS_2$  are arranged from small to large.

|                  | configuration |             |             |             |            |             |
|------------------|---------------|-------------|-------------|-------------|------------|-------------|
|                  | $0^\circ$     | $180^\circ$ | $300^\circ$ | $240^\circ$ | $60^\circ$ | $120^\circ$ |
| $E_f(\text{eV})$ | -0.13         | -0.10       | 0.18        | 0.28        | 0.29       | 0.36        |
| $d(\text{\AA})$  | 3.20          | 3.23        | 3.43        | 3.51        | 3.57       | 3.65        |

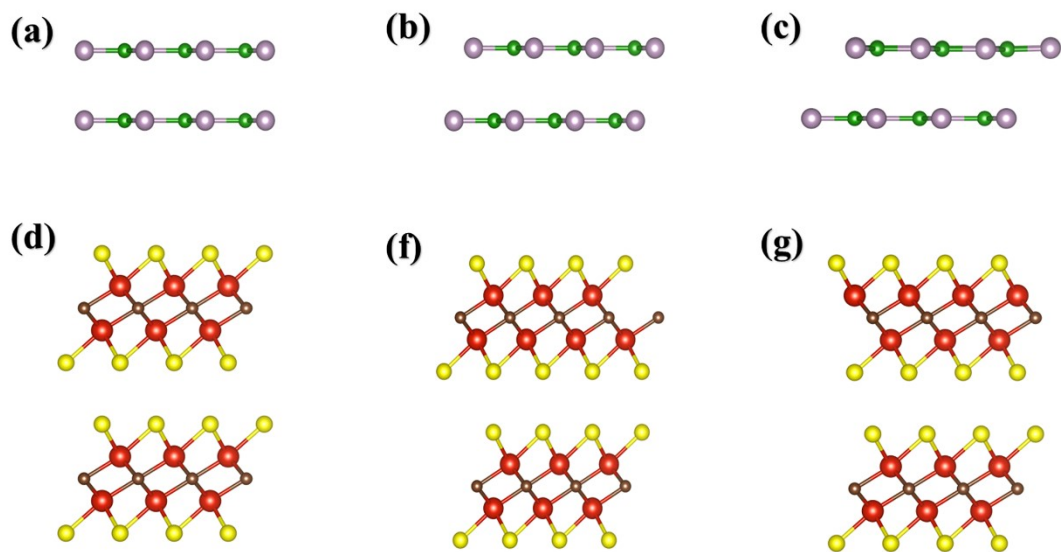

Figure S3. Three stacking configurations of Dh-BP (a, b, c) and DV<sub>2</sub>CS<sub>2</sub> (d, f, g). The (b) and (d) are the easiest ways to combine h-BP and V<sub>2</sub>CS<sub>2</sub> monolayers to double layers, respectively.

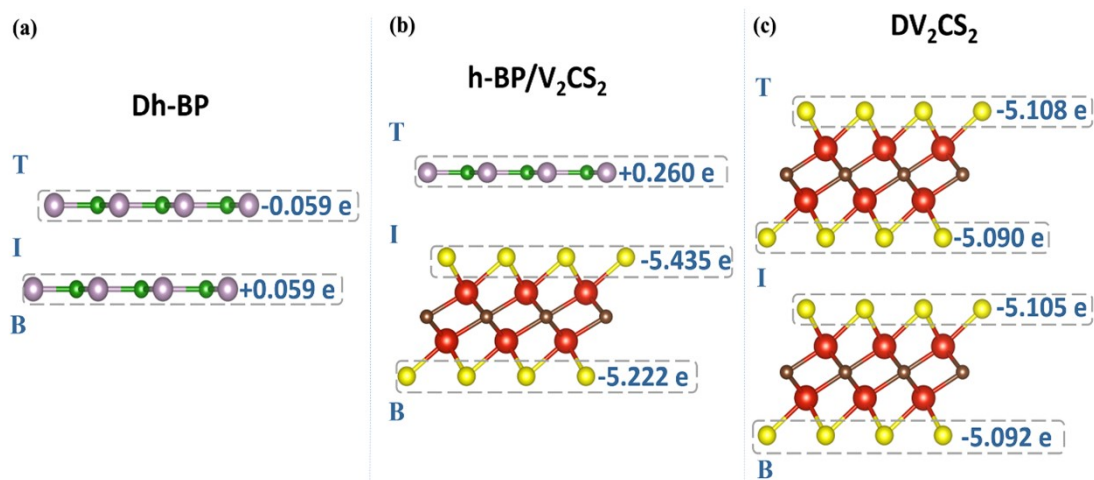

Figure S4. The accumulated charge of each surface layer atoms of (a) Dh-BP, (b) h-BP/V<sub>2</sub>CS<sub>2</sub> and (3) DV<sub>2</sub>CS<sub>2</sub> before adsorbing a metal atom.

Table S2. Comparison of adsorption energy of heterostructures adsorbing a metal atom on three surfaces. Bold number indicates the most negative adsorption energy on three surfaces in the same system.

| site                                                 | T      | I             | B             | reference |
|------------------------------------------------------|--------|---------------|---------------|-----------|
| Li@MoS <sub>2</sub> /V <sub>2</sub> CS <sub>2</sub>  | -0.521 | <b>-1.920</b> | -1.652        | 1         |
| Na@MoS <sub>2</sub> /V <sub>2</sub> CS <sub>2</sub>  | -0.355 | <b>-1.715</b> | -1.394        | 1         |
| Mg@MoS <sub>2</sub> /V <sub>2</sub> CS <sub>2</sub>  | 1.157  | <b>-1.025</b> | 0.096         | 1         |
| K@MoS <sub>2</sub> /V <sub>2</sub> CS <sub>2</sub>   | -0.790 | <b>-1.955</b> | -1.733        | 1         |
| Li@MoS <sub>2</sub> /Ti <sub>2</sub> CF <sub>2</sub> | -0.32  | <b>-1.68</b>  | -1.01         | 2         |
| Li@MoS <sub>2</sub> /Ti <sub>2</sub> CO <sub>2</sub> | -0.31  | <b>-2.22</b>  | -2.01         | 2         |
| Li@BlueP/Ti <sub>2</sub> CS <sub>2</sub>             | -1.178 | <b>-2.368</b> | -2.21         | 3         |
| Li@VS <sub>2</sub> /Ti <sub>2</sub> CO <sub>2</sub>  | ~-1.8  | ~-2.6         | ~-2.0         | 4         |
| Na@VS <sub>2</sub> /Ti <sub>2</sub> CO <sub>2</sub>  | ~-1.7  | ~-2.3         | ~-1.9         | 4         |
| Mg@VS <sub>2</sub> /Ti <sub>2</sub> CO <sub>2</sub>  | ~-0.6  | ~-2.8         | ~-1.1         | 4         |
| Li@h-BP/V <sub>2</sub> CS <sub>2</sub>               | -1.017 | <b>-1.998</b> | -1.668        | this work |
| Na@h-BP/V <sub>2</sub> CS <sub>2</sub>               | -0.950 | -1.545        | <b>-1.575</b> | this work |
| Mg@h-BP/V <sub>2</sub> CS <sub>2</sub>               | 1.028  | <b>-1.314</b> | -0.279        | this work |
| Ca@h-BP/V <sub>2</sub> CS <sub>2</sub>               | -0.410 | <b>-2.642</b> | -2.003        | this work |

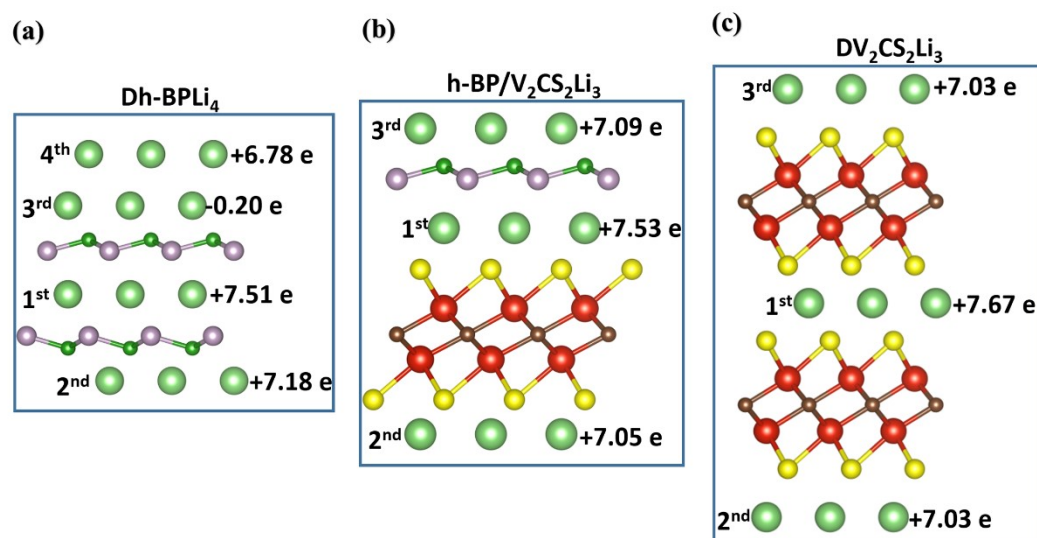

Figure S5. Number of electrons gained (-) or lost (+) per layer of Na atoms in the hosts that absorbs the most layers of Na atoms.

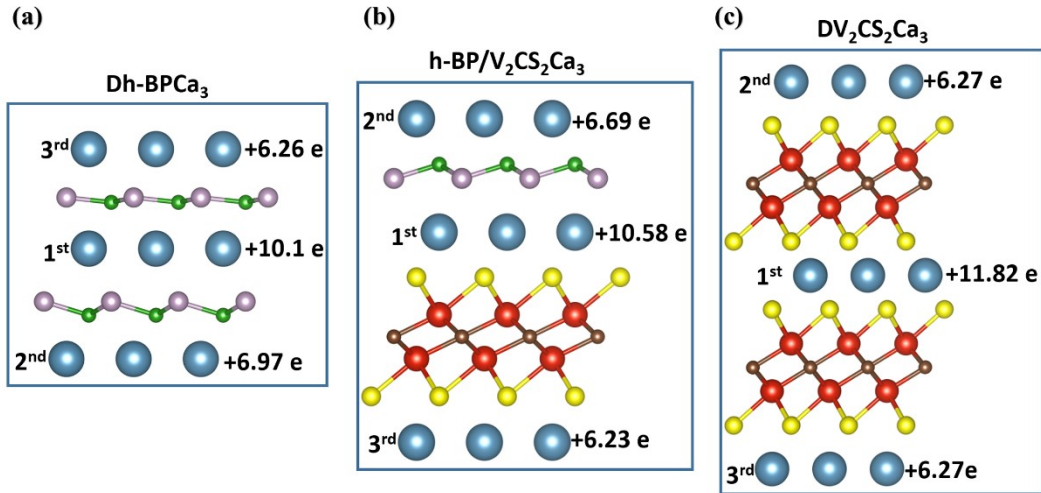

Figure S6. Number of electrons lost (+) per layer of Ca atoms in the hosts that absorbs the most layers of Ca atoms.

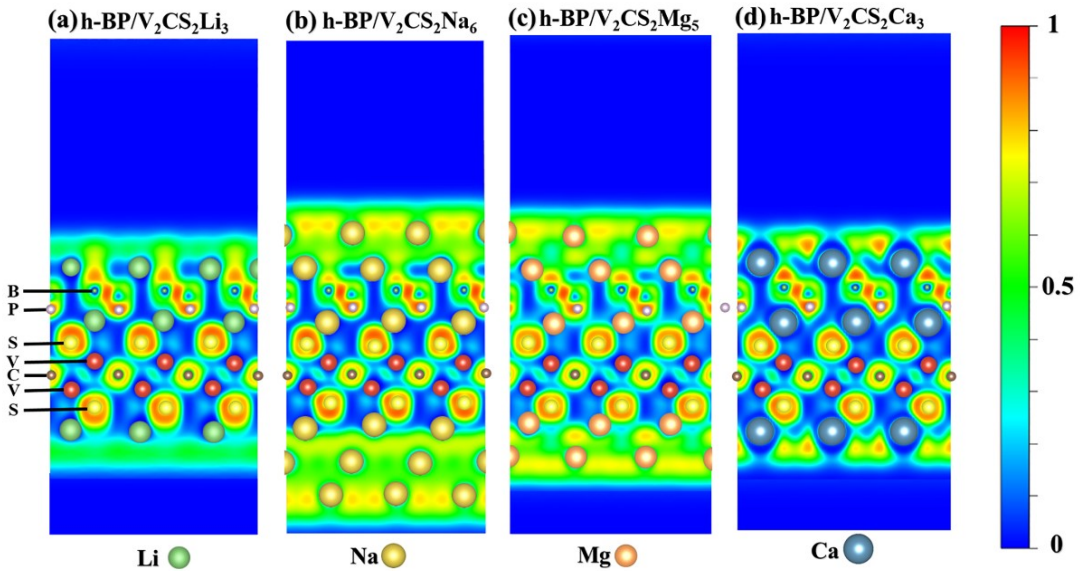

Figure S7. ELF plots of the (110) slices of h-BP/V<sub>2</sub>CS<sub>2</sub> heterostructure loading (a) Li, (b) Na, (c) Mg and (d) Ca at maximum concentration.



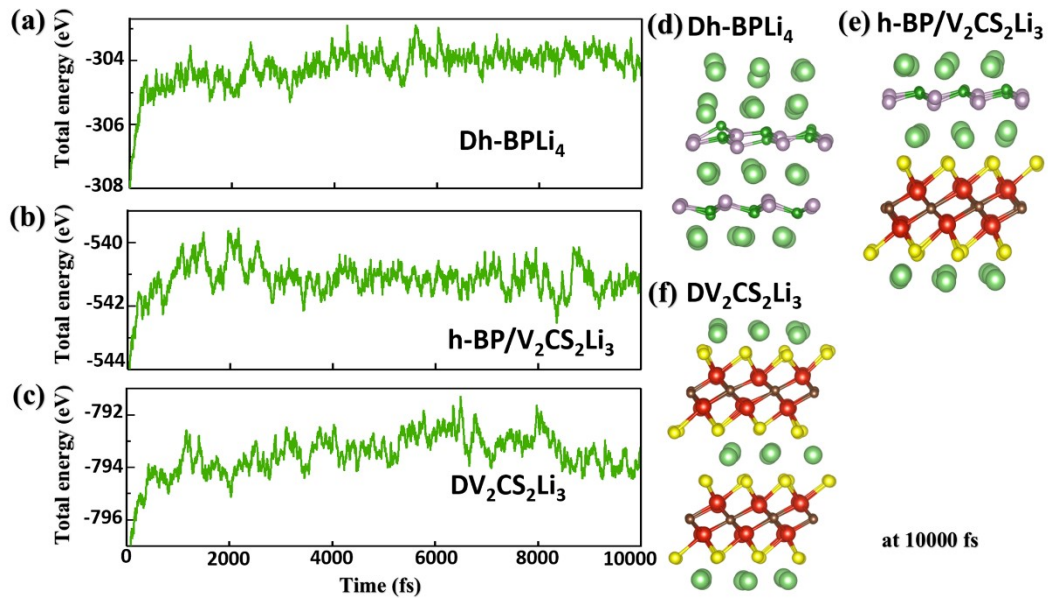

Figure S8. Total energy fluctuations within 10000 fs and snapshots at 10000 fs of (a, d) Dh-BPLi<sub>4</sub>, (b, e) h-BP/V<sub>2</sub>CS<sub>2</sub>Li<sub>3</sub> and (c, f) DV<sub>2</sub>CS<sub>2</sub>Li<sub>3</sub> calculated by AIMD heating at 300 K.

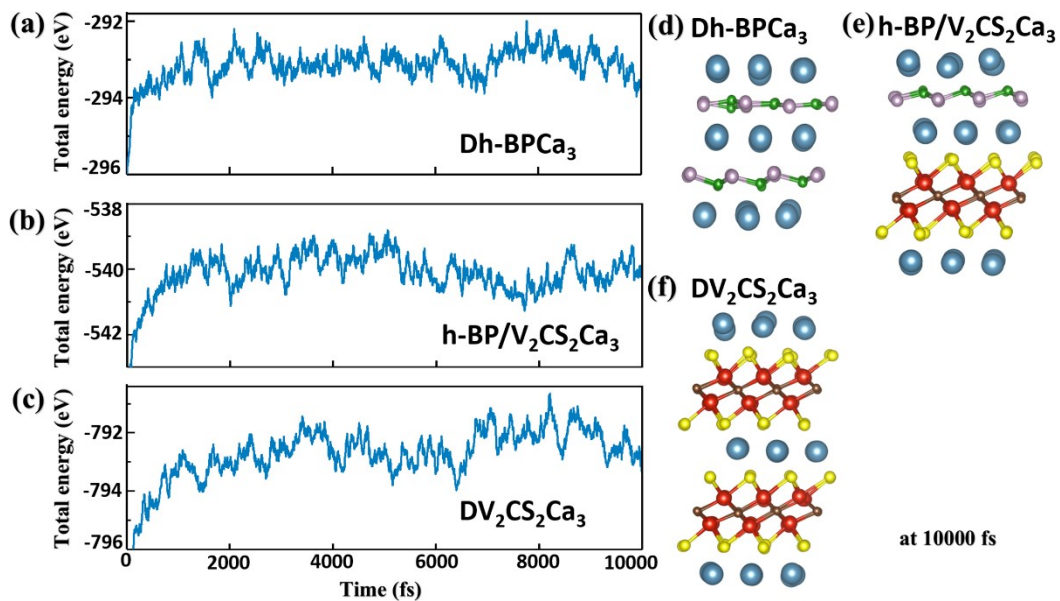

Figure S9. Total energy fluctuations within 10000 fs and snapshots at 10000 fs of (a, d) Dh-BPCa<sub>3</sub>, (b, e) h-BP/V<sub>2</sub>CS<sub>2</sub>Ca<sub>3</sub> and (c, f) DV<sub>2</sub>CS<sub>2</sub>Ca<sub>3</sub> calculated by AIMD heating at 300 K.

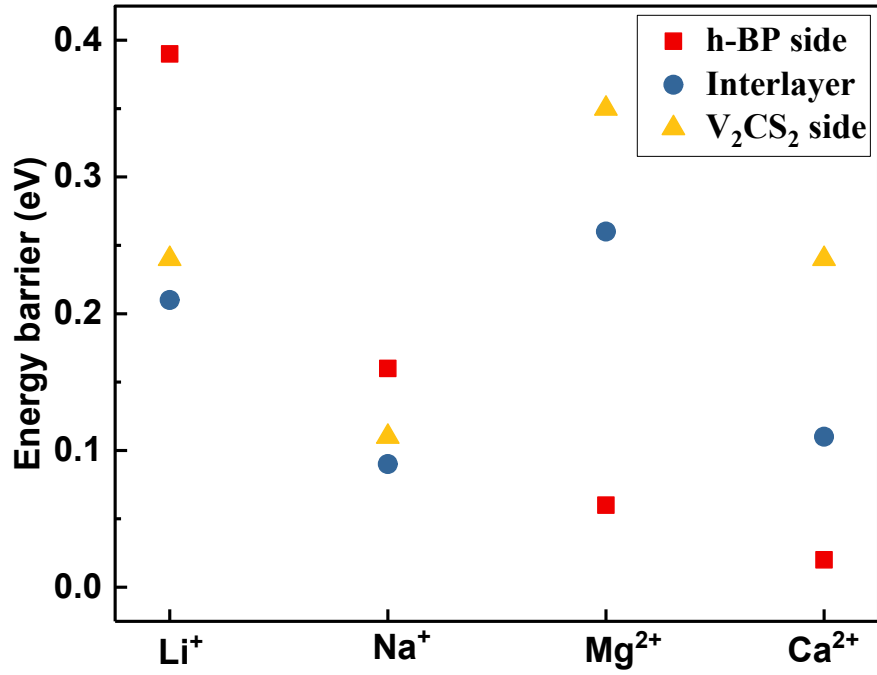

Figure S10. The energy barriers of a metal ion in the interlayer and both sides of the heterostructure.

1. X. Yuan, Z. Chen, B. Huang, Y. He and N. Zhou, *The Journal of Physical Chemistry C*, 2021, **125**, 10226-10234.
2. J. Li, Q. Peng, J. Zhou and Z. Sun, *The Journal of Physical Chemistry C*, 2019, **123**, 11493-11499.
3. X. Yuan, Z. Zhang, Y. He, S. Zhao and N. Zhou, *The Journal of Physical Chemistry C*, 2022, **126**, 91-101.
4. N. Li, Y. Li, X. Zhu, C. Huang and J. Fan, *Applied Surface Science*, 2021, **543**, 148772.
